# Supplementary material
Source: Springer Nature journal article supplement (https://www.springermedizin.de/resource/supplementary/12876_2003_63_MOESM2_ESM.pdf/9438622)

# MEAN DAILY FOOD INTAKE

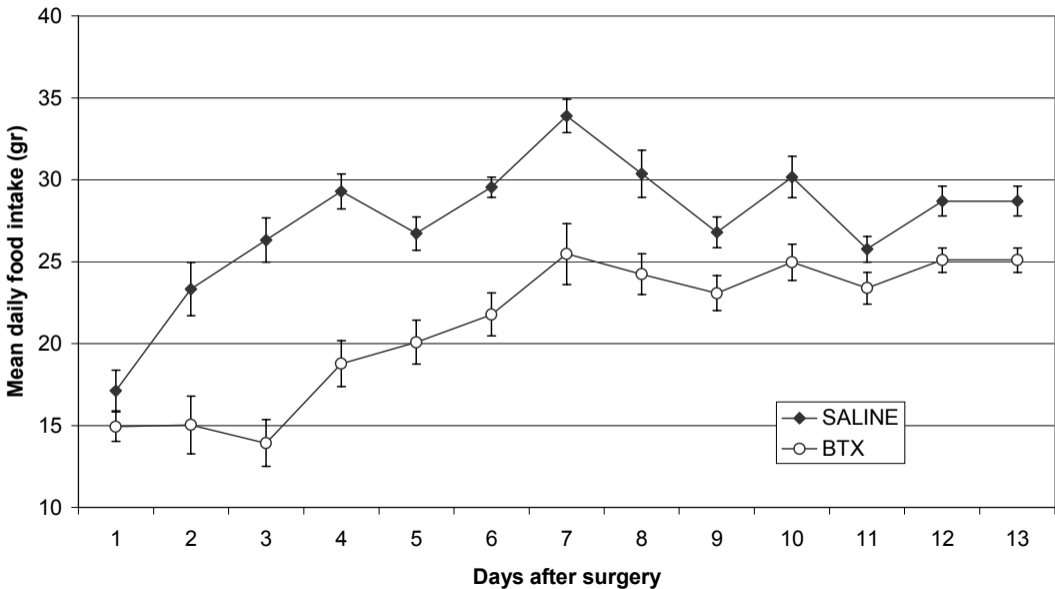

Supplement: MOESM2 [file 9438622]
